# Supplementary material
Source: PubMed Central journal article supplement (PMC4788182)
Supplement: banr835900.ww1_default.pdf [file banr835900.ww1_default.pdf]

**Appendix:** Sampled systematic reviews, relative source, and systematic reviews censored because of clear evidence that the topic was not covered by point-of-care summaries\* [posted as supplied by author]

- Totals for point-of-care summary: Clinical Evidence: 26/128 (20%); Dynamed: 7/128 (5.5%); EBM Guideline: 7/128 (5.5%); eMedicine: 12/128 (9.4%); UpToDate: 10/128 (7.8%). Among these six systematic reviews were censored by all the five point-of-care summaries (id=4, 22, 44, 52, 57, 67).

| <b>Id</b> | <b>Reference</b>                                                                                                                                                                                                                                                                                                        | <b>Source</b>                       | <b>Point of care summary in which a given systematic review topic was not covered</b> |
|-----------|-------------------------------------------------------------------------------------------------------------------------------------------------------------------------------------------------------------------------------------------------------------------------------------------------------------------------|-------------------------------------|---------------------------------------------------------------------------------------|
| 1         | Lim Jerome, McKean Michael C. Adenotonsillectomy for obstructive sleep apnoea in children. Cochrane Database of Systematic Reviews: Reviews 2009 Issue 2                                                                                                                                                                | Cochrane Library-Conclusion Changed |                                                                                       |
| 2         | Gowing Linda, Farrell Michael, Ali Robert, White Jason M. Alpha2-adrenergic agonists for the management of opioid withdrawal. Cochrane Database of Systematic Reviews: Reviews 2009 Issue 2                                                                                                                             | Cochrane Library-Conclusion Changed |                                                                                       |
| 3         | Bize Raphaël, Burnand Bernard, Mueller Yolanda, Rège Walther Myriam, Cornuz Jacques. Biomedical risk assessment as an aid for smoking cessation. Cochrane Database of Systematic Reviews: Reviews 2009 Issue 2                                                                                                          | Cochrane Library-Conclusion Changed | Clinical Evidence                                                                     |
| 4         | Forsetlund Louise, Bjørndal Arild, Rashidian Arash, Jamtvedt Gro, O'Brien Mary Ann, Wolf Fredric, Davis Dave, Odgaard-Jensen Jan, Oxman Andrew D. Continuing education meetings and workshops: effects on professional practice and health care outcomes. Cochrane Database of Systematic Reviews: Reviews 2009 Issue 2 | Cochrane Library-Conclusion Changed | Clinical Evidence<br>Dynamed<br>EBM Guidelines eMedicine<br>UpToDate                  |
| 5         | Navaneethan Sankar D, Nigwekar Sagar U, Perkovic Vlado, Johnson David W, Craig Jonathan C, Strippoli Giovanni FM. HMG CoA reductase inhibitors (statins) for dialysis patients. Cochrane Database of Systematic Reviews: Reviews 2009 Issue 2                                                                           | Cochrane Library-Conclusion Changed |                                                                                       |
| 6         | Sydenham Emma, Roberts Ian, Alderson Phil. Hypothermia for traumatic head injury. Cochrane Database of Systematic Reviews: Reviews 2009 Issue 2                                                                                                                                                                         | Cochrane Library-Conclusion Changed |                                                                                       |
| 7         | Roberts Leanne, Ahmed Irshad, Hall Steve, Davison Andrew. Intercessory prayer for the alleviation of ill health. Cochrane Database of Systematic Reviews: Reviews 2009 Issue 2                                                                                                                                          | Cochrane Library-Conclusion Changed | Clinical Evidence<br>Dynamed<br>EBM Guidelines eMedicine                              |
| 8         | Boyd Michelle, Lasserson Toby J, McKean Michael C, Gibson Peter G, Ducharme Francine M, Haby Michelle. Interventions for educating children who are at risk of asthma-related emergency department attendance. Cochrane Database of Systematic Reviews: Reviews 2009 Issue 2                                            | Cochrane Library-Conclusion Changed |                                                                                       |
| 9         | Siegfried Nandi, Muller Martie, Deeks Jonathan J, Volmink Jimmy. Male circumcision for prevention of heterosexual acquisition of HIV in men. Cochrane Database of Systematic Reviews: Reviews 2009 Issue 2                                                                                                              | Cochrane Library-Conclusion Changed |                                                                                       |
| 10        | Wark Peter, McDonald Vanessa M. Nebulised hypertonic saline for cystic fibrosis. Cochrane Database of Systematic Reviews: Reviews 2009 Issue 2                                                                                                                                                                          | Cochrane Library-Conclusion Changed | Clinical Evidence                                                                     |

|    |                                                                                                                                                                                                                         |                                     |                                                                         |
|----|-------------------------------------------------------------------------------------------------------------------------------------------------------------------------------------------------------------------------|-------------------------------------|-------------------------------------------------------------------------|
| 11 | Chang Christina C, Singleton Rosalyn J, Morris Peter S, Chang Anne B. Pneumococcal vaccines for children and adults with bronchiectasis. Cochrane Database of Systematic Reviews: Reviews 2009 Issue 2                  | Cochrane Library-Conclusion Changed |                                                                         |
| 12 | Milne Anne C, Potter Jan, Vivanti Angela, Avenell Alison. Protein and energy supplementation in elderly people at risk from malnutrition. Cochrane Database of Systematic Reviews: Reviews 2009 Issue 2                 | Cochrane Library-Conclusion Changed | Clinical Evidence                                                       |
| 13 | Birks Jacqueline, Grimley Evans John, Iakovidou Vasso, Tsolaki Magda, Holt Francesca E. Rivastigmine for Alzheimer's disease. Cochrane Database of Systematic Reviews: Reviews 2009 Issue 2                             | Cochrane Library-Conclusion Changed |                                                                         |
| 14 | Tacklind James, MacDonald Roderick, Rutks Indy, Wilt Timothy J. Serenoa repens for benign prostatic hyperplasia. Cochrane Database of Systematic Reviews: Reviews 2009 Issue 2                                          | Cochrane Library-Conclusion Changed |                                                                         |
| 15 | Derry Philip, Derry Sheena, Moore R Andrew, McQuay Henry J. Single dose oral diclofenac for acute postoperative pain in adults. Cochrane Database of Systematic Reviews: Reviews 2009 Issue 2                           | Cochrane Library-Conclusion Changed | Clinical Evidence<br>eMedicine                                          |
| 16 | McGuinness Bernadette, Craig David, Bullock Roger, Passmore Peter. Statins for the prevention of dementia. Cochrane Database of Systematic Reviews: Reviews 2009 Issue 2                                                | Cochrane Library-Conclusion Changed |                                                                         |
| 17 | Lee Anna, Fan Lawrence TY. Stimulation of the wrist acupuncture point P6 for preventing postoperative nausea and vomiting. Cochrane Database of Systematic Reviews: Reviews 2009 Issue 2                                | Cochrane Library-Conclusion Changed | Clinical Evidence                                                       |
| 18 | Colquitt Jill L, Picot Joanna, Loveman Emma, Clegg Andrew J. Surgery for obesity. Cochrane Database of Systematic Reviews: Reviews 2009 Issue 2                                                                         | Cochrane Library-Conclusion Changed |                                                                         |
| 19 | Shoptaw Steven J, Kao Uyen, Heinzerling Keith, Ling Walter. Treatment for amphetamine withdrawal. Cochrane Database of Systematic Reviews: Reviews 2009 Issue 2                                                         | Cochrane Library-Conclusion Changed | Clinical Evidence                                                       |
| 20 | De Luca G, Biondi-Zoccai G, Marino P. Transferring patients with ST-segment elevation myocardial infarction for mechanical reperfusion: a meta-regression analysis of randomized trials. Ann Emerg Med. 2008;52:665-76. | ACP Journal Club                    |                                                                         |
| 21 | Mills EJ, Rachlis B, Wu P, et al. Primary prevention of cardiovascular mortality and events with statin treatments: a network meta-analysis involving more than 65, 000 patients. J Am Coll Cardiol. 2008;52:1769-81.   | ACP Journal Club                    |                                                                         |
| 22 | Kesselheim AS, Misono AS, Lee JL, et al. Clinical equivalence of generic and brand-name drugs used in cardiovascular disease: a systematic review and meta-analysis. JAMA. 2008;300:2514-26.                            | ACP Journal Club                    | Clinical Evidence<br>Dynamed<br>EBM Guidelines<br>eMedicine<br>UpToDate |
| 23 | Selvin E, Bolen S, Yeh HC, et al. Cardiovascular outcomes in trials of oral diabetes medications: a systematic review. Arch Intern Med. 2008;168:2070-80.                                                               | ACP Journal Club                    |                                                                         |
| 24 | Nicholson W, Bolen S, Witkop CT, et al. Benefits and risks of oral diabetes agents compared with insulin in                                                                                                             | ACP Journal Club                    | Clinical Evidence                                                       |

|    |                                                                                                                                                                                                                                                                                                               |                         |                   |
|----|---------------------------------------------------------------------------------------------------------------------------------------------------------------------------------------------------------------------------------------------------------------------------------------------------------------|-------------------------|-------------------|
|    | women with gestational diabetes: a systematic review. <i>Obstet Gynecol.</i> 2009;113:193-205.                                                                                                                                                                                                                |                         |                   |
| 25 | Prasad K, Mendelow AD, Gregson B. Surgery for primary supratentorial intracerebral haemorrhage. <i>Cochrane Database Syst Rev.</i> 2008;4:CD000200.                                                                                                                                                           | ACP Journal Club        |                   |
| 26 | Sung JJ, Tsoi KK, Wong VW, Li KC, Chan HL. Meta-analysis: Treatment of hepatitis B infection reduces risk of hepatocellular carcinoma. <i>Aliment Pharmacol Ther.</i> 2008;28:1067-77.                                                                                                                        | ACP Journal Club        | Clinical Evidence |
| 27 | Mitchell AJ, Shiri-Feshki M. Temporal trends in the long term risk of progression of mild cognitive impairment: a pooled analysis. <i>J Neurol Neurosurg Psychiatry.</i> 2008;79:1386-91                                                                                                                      | ACP Journal Club        |                   |
| 28 | Hernández-Molina G, Reichenbach S, Zhang B, et al. Effect of therapeutic exercise for hip osteoarthritis pain: results of a meta-analysis. <i>Arthritis Rheum</i> 2008;59:1221-8.                                                                                                                             | Evidence-Based Medicine |                   |
| 29 | Singh S, Loke YK, Furberg CD. Inhaled anticholinergics and risk of major adverse cardiovascular events in patients with chronic obstructive pulmonary disease: a systematic review and meta-analysis. <i>JAMA</i> 2008;300:1439-50.                                                                           | Evidence-Based Medicine |                   |
| 30 | Heran BS, Wong MM, Heran IK, et al. Blood pressure lowering efficacy of angiotensin converting enzyme (ACE) inhibitors for primary hypertension. <i>Cochrane Database Syst Rev</i> 2008;(4):CD003823.                                                                                                         | Evidence-Based Medicine |                   |
| 31 | Kaltenthaler E, Parry G, Beverley C, et al. Computerised cognitive-behavioural therapy for depression: systematic review. <i>Br J Psychiatry</i> 2008;193:181-4.                                                                                                                                              | Evidence-Based Medicine |                   |
| 32 | Hay-Smith J, Mørkved S, Fairbrother KA, et al. Pelvic floor muscle training for prevention and treatment of urinary and faecal incontinence in antenatal and postnatal women. <i>Cochrane Database Syst Rev</i> 2008;(4):CD007471.                                                                            | Evidence-Based Medicine |                   |
| 33 | Sanders S, Barnett A, Correa-Velez I, et al. Systematic review of the diagnostic accuracy of C-reactive protein to detect bacterial infection in nonhospitalized infants and children with fever. <i>J Pediatr</i> 2008;153:570-4.                                                                            | Evidence-Based Medicine | Clinical Evidence |
| 34 | Carrier M, Le Gal G, Wells PS, et al. Systematic review: the Trousseau syndrome revisited: should we screen extensively for cancer in patients with venous thromboembolism? <i>Ann Intern Med</i> 2008;149:323-33.                                                                                            | Evidence-Based Medicine |                   |
| 35 | Blair PS, Mitchell EA, Heckstall-Smith EM, et al. Head covering—a major modifiable risk factor for sudden infant death syndrome: a systematic review. <i>Arch Dis Child</i> 2008;93:778-83.                                                                                                                   | Evidence-Based Medicine |                   |
| 36 | Verhovsek M, Douketis JD, Yi Q, et al. Systematic review: D-dimer to predict recurrent disease after stopping anticoagulant therapy for unprovoked venous thromboembolism. <i>Ann Intern Med</i> 2008;149:481-90, W94.                                                                                        | Evidence-Based Medicine | Clinical Evidence |
| 37 | Huss A, Scott P, Stuck AE, et al. Efficacy of pneumococcal vaccination in adults: a meta-analysis. <i>CMAJ.</i> 2009;180:48-58.                                                                                                                                                                               | ACP Journal Club        |                   |
| 38 | Shamliyan TA, Macdonald R, Shaikat A, et al. Antiviral therapy for adults with chronic hepatitis B: a systematic review for a National Institutes of Health Consensus Development Conference. <i>Ann Intern Med.</i> 2009;150:111-24.                                                                         | ACP Journal Club        | Clinical Evidence |
| 39 | Singh A, Alter HJ, Zaia B. Does the addition of dexamethasone to standard therapy for acute migraine headache decrease the incidence of recurrent headache for patients treated in the emergency department? A meta-analysis and systematic review of the literature. <i>Acad Emerg Med.</i> 2008;15:1223-33. | ACP Journal Club        |                   |
| 40 | Met R, Bipat S, Legemate DA, Reekers JA, Koelemay MJ. Diagnostic performance of computed tomography angiography in peripheral arterial disease: a systematic review and meta-analysis. <i>JAMA.</i> 2009;301:415-24                                                                                           | ACP Journal Club        |                   |
| 41 | Drummond MB, Dasenbrook EC, Pitz MW, et al Inhaled corticosteroids in patients with stable chronic obstructive pulmonary disease: a systematic review and meta-analysis. <i>JAMA</i> 2008;300:2407-16.                                                                                                        | Evidence-Based Medicine |                   |
| 42 | Sherrington C, Whitney JC, Lord SR, et al. Effective exercise for the prevention of falls: a systematic review                                                                                                                                                                                                | Evidence-Based          |                   |

|    |                                                                                                                                                                                                                                                                                                                    |                                            |                                                                         |
|----|--------------------------------------------------------------------------------------------------------------------------------------------------------------------------------------------------------------------------------------------------------------------------------------------------------------------|--------------------------------------------|-------------------------------------------------------------------------|
|    | and meta-analysis. J Am Geriatr Soc 2008;56:2234–43.                                                                                                                                                                                                                                                               | Medicine                                   |                                                                         |
| 43 | Cates CJ, Cates MJ, Lasserson TJ. Regular treatment with formoterol for chronic asthma: serious adverse events. Cochrane Database Syst Rev 2008;(4):CD006923.                                                                                                                                                      | Evidence-Based<br>Medicine                 |                                                                         |
| 44 | Shepperd S, Doll H, Angus RM, et al. Admission avoidance hospital at home. Cochrane Database Syst Rev 2008;(4):CD007491.                                                                                                                                                                                           | Evidence-Based<br>Medicine                 | Clinical Evidence<br>Dynamed<br>EBM Guidelines<br>eMedicine<br>UpToDate |
| 45 | Sjögren P, Nilsson E, Forsell M, et al. A systematic review of the preventive effect of oral hygiene on pneumonia and respiratory tract infection in elderly people in hospitals and nursing homes: effect estimates and methodological quality of randomized controlled trials. J Am Geriatr Soc 2008;56:2124–30. | Evidence-Based<br>Medicine                 |                                                                         |
| 46 | Gartlehner G, Gaynes BN, Hansen RA, et al. Comparative benefits and harms of second-generation antidepressants: background paper for the American College of Physicians. Ann Intern Med 2008;149:734–50.                                                                                                           | Evidence-Based<br>Medicine                 |                                                                         |
| 47 | Ford AC, Talley NJ, Spiegel BM, et al. Effect of fibre, antispasmodics, and peppermint oil in the treatment of irritable bowel syndrome: systematic review and meta-analysis. BMJ 2008;337:a2313.                                                                                                                  | Evidence-Based<br>Medicine                 |                                                                         |
| 48 | Chou R, Fu R, Carrino JA, Deyo RA. Imaging strategies for low-back pain: systematic review and meta-analysis. Lancet. 2009;373:463-72.                                                                                                                                                                             | ACP Journal Club                           | Clinical Evidence                                                       |
| 49 | Barbui C, Esposito E, Cipriani A. Selective serotonin reuptake inhibitors and risk of suicide: a systematic review of observational studies. CMAJ. 2009;180:291-7.                                                                                                                                                 | ACP Journal Club                           |                                                                         |
| 50 | Linda Gowing, Robert Ali, Jason M White Buprenorphine for the management of opioid withdrawal                                                                                                                                                                                                                      | Cochrane Library-<br>Conclusion<br>Changed |                                                                         |
| 51 | Robinder G Khemani, Adrienne Randolph, Barry Markovitz Corticosteroids for the prevention and treatment of post-extubation stridor in neonates, children and adults                                                                                                                                                | Cochrane Library-<br>Conclusion<br>Changed | Clinical Evidence                                                       |
| 52 | Annette M. O'Connor, Carol L Bennett, et al<br>Decision aids for people facing health treatment or screening decisions                                                                                                                                                                                             | Cochrane Library-<br>Conclusion<br>Changed | Clinical Evidence<br>Dynamed<br>EBM Guidelines<br>eMedicine<br>UpToDate |
| 53 | Judd L Walson, Bradley R Herrin, Grace John-Stewart Deworming helminth co-infected individuals for delaying HIV disease progression                                                                                                                                                                                | Cochrane Library-<br>Conclusion<br>Changed |                                                                         |
| 54 | Sarah Bombell, William McGuire Early trophic feeding for very low birth weight infants                                                                                                                                                                                                                             | Cochrane Library-<br>Conclusion<br>Changed | Clinical Evidence<br>UpToDate                                           |
| 55 | Chao Liu, Junmin Chen, Yanqiu Gao, Bao Deng, Kunshen Liu1 Endothelin receptor antagonists for pulmonary arterial hypertension                                                                                                                                                                                      | Cochrane Library-<br>Conclusion<br>Changed | Clinical Evidence                                                       |
| 56 | Gisele Huf, Jacob Alexander, Michael H Allen, Nirmal S Raveendran Haloperidol plus promethazine for                                                                                                                                                                                                                | Cochrane Library-                          |                                                                         |

|    |                                                                                                                                                                                                                      |                                     |                                                                         |
|----|----------------------------------------------------------------------------------------------------------------------------------------------------------------------------------------------------------------------|-------------------------------------|-------------------------------------------------------------------------|
|    | psychosis-induced aggression                                                                                                                                                                                         | Conclusion Changed                  |                                                                         |
| 57 | Merrick Zwarenstein, Joanne Goldman, Scott Reeves Interprofessional collaboration: effects of practice-based interventions on professional practice and healthcare outcomes                                          | Cochrane Library-Conclusion Changed | Clinical Evidence<br>Dynamed<br>EBM Guidelines<br>eMedicine<br>UpToDate |
| 58 | Helen HG Handoll, Paddy Pearce Interventions for isolated diaphyseal fractures of the ulna in adults                                                                                                                 | Cochrane Library-Conclusion Changed | eMedicine<br>UpToDate                                                   |
| 59 | Bradley N Manktelow, John F Potter Interventions in the management of serum lipids for preventing stroke recurrence                                                                                                  | Cochrane Library-Conclusion Changed |                                                                         |
| 60 | Chiung-ju Liu, Nancy K Latham Progressive resistance strength training for improving physical function in older adults                                                                                               | Cochrane Library-Conclusion Changed |                                                                         |
| 61 | Christopher Derry, Sheena Derry, R Andrew Moore, Henry J McQuay Single dose oral ibuprofen for acute postoperative pain in adults                                                                                    | Cochrane Library-Conclusion Changed | Clinical Evidence<br>eMedicine                                          |
| 62 | Helen Gaskell, Sheena Derry, R Andrew Moore, Henry J McQuay Single dose oral oxycodone and oxycodone plus paracetamol (acetaminophen) for acute postoperative pain in adults                                         | Cochrane Library-Conclusion Changed | Clinical Evidence<br>eMedicine                                          |
| 63 | Theodoor E Nieboer, Neil Johnson, Anne Lethaby et al Surgical approach to hysterectomy for benign gynaecological disease                                                                                             | Cochrane Library-Conclusion Changed |                                                                         |
| 64 | Arturo J Martí-Carvajal, Ivan Solà, Luis H Agreda-Pérez Treatment for avascular necrosis of bone in people with sickle cell disease                                                                                  | Cochrane Library-Conclusion Changed |                                                                         |
| 65 | Eleanor C Hancock, Helen HJ Cross Treatment of Lennox-Gastaut syndrome                                                                                                                                               | Cochrane Library-Conclusion Changed |                                                                         |
| 66 | Nisreen Alwan, Derek J Tuffnell, Jane West Treatments for gestational diabetes                                                                                                                                       | Cochrane Library-Conclusion Changed | Clinical Evidence                                                       |
| 67 | Anneliese Spinks, Cathy Turner, Jim Nixon, Roderick J McClu The 'WHO Safe Communities' model for the prevention of injury in whole populations                                                                       | Cochrane Library-Conclusion Changed | Clinical Evidence<br>Dynamed<br>EBM Guidelines<br>eMedicine<br>UpToDate |
| 68 | Heerspink HJ, Ninomiya T, Zoungas S, et al. Effect of lowering blood pressure on cardiovascular events and mortality in patients on dialysis: a systematic review and meta-analysis of randomised controlled trials. | ACP Journal Club                    |                                                                         |

|    |                                                                                                                                                                                                                                                                |                         |                   |
|----|----------------------------------------------------------------------------------------------------------------------------------------------------------------------------------------------------------------------------------------------------------------|-------------------------|-------------------|
|    | Lancet. 2009;373:1009-15.                                                                                                                                                                                                                                      |                         |                   |
| 69 | Hlatky MA, Boothroyd DB, Bravata DM, et al. Coronary artery bypass surgery compared with percutaneous coronary interventions for multivessel disease: a collaborative analysis of individual patient data from ten randomised trials. Lancet. 2009;373:1190-7. | ACP Journal Club        |                   |
| 70 | Cipriani A, Furukawa TA, Salanti G, et al. Comparative efficacy and acceptability of 12 new-generation antidepressants: a multiple-treatments meta-analysis. Lancet. 2009;373:746-58                                                                           | ACP Journal Club        |                   |
| 71 | Hajek P, Stead LF, West R, Jarvis M, Lancaster T. Relapse prevention interventions for smoking cessation. Cochrane Database Syst Rev. 2009;(1):CD003999                                                                                                        | ACP Journal Club        | Clinical Evidence |
| 72 | Reddy M, Gill SS, Kalkar SR, et al. Treatment of pressure ulcers: a systematic review. JAMA. 2008;300:2647-62                                                                                                                                                  | ACP Journal Club        |                   |
| 73 | Griesdale DE, de Souza RJ, van Dam RM, et al. Intensive insulin therapy and mortality among critically ill patients: a meta-analysis including NICE-SUGAR study data. CMAJ. 2009;180:821-7                                                                     | ACP Journal Club        |                   |
| 74 | Bulughapitiya U, Siyambalapatiya S, Sithole J, Idris I. Is diabetes a coronary risk equivalent? Systematic review and meta-analysis. Diabet Med. 2009;26:142-8.                                                                                                | ACP Journal Club        |                   |
| 75 | Bischoff-Ferrari HA, Willett WC, Wong JB, et al. Prevention of nonvertebral fractures with oral vitamin D and dose dependency: a meta-analysis of randomized controlled trials. Arch Intern Med. 2009;169:551-61                                               | ACP Journal Club        |                   |
| 76 | Ezekowitz JA, McAlister FA. Aldosterone blockade and left ventricular dysfunction: a systematic review of randomized clinical trials. Eur Heart J. 2009;30:469-77                                                                                              | ACP Journal Club        |                   |
| 77 | Wald DS, Law M, Morris JK, Bestwick JP, Wald NJ. Combination therapy versus monotherapy in reducing blood pressure: meta-analysis on 11, 000 participants from 42 trials. Am J Med. 2009;122:290-300.                                                          | ACP Journal Club        |                   |
| 78 | Thomas D, Elliott EJ. Low glycaemic index, or low glycaemic load, diets for diabetes mellitus. Cochrane Database Syst Rev 2009;(1):CD006296.                                                                                                                   | Evidence-Based Medicine |                   |
| 79 | Roberts NP, Kitchiner NJ, Kenardy J, et al. Systematic review and meta-analysis of multiple-session early interventions following traumatic events. Am J Psychiatry 2009;166:293–301.                                                                          | Evidence-Based Medicine |                   |
| 80 | van Rijen M, Bonten M, Wenzel R, et al. Mupirocin ointment for preventing Staphylococcus aureus infections in nasal carriers. Cochrane Database Syst Rev 2008;(4):CD006216.                                                                                    | Evidence-Based Medicine |                   |
| 81 | Cuijpers P, van Straten A, Andersson G, et al. Psychotherapy for depression in adults: a meta-analysis of comparative outcome studies. J Consult Clin Psychol 2008;76:909–22.                                                                                  | Evidence-Based Medicine |                   |
| 82 | Bigos SJ, Holland J, Holland C, et al. High-quality controlled trials on preventing episodes of back problems: systematic literature review in working-age adults. Spine J 2009;9:147–68.                                                                      | Evidence-Based Medicine |                   |
| 83 | Ford AC, Talley NJ, Schoenfeld PS, et al. Efficacy of antidepressants and psychological therapies in irritable bowel syndrome: systematic review and meta-analysis. Gut 2009;58:367–78.                                                                        | Evidence-Based Medicine |                   |
| 84 | Baigent C, Blackwell L, Collins R, et al. Aspirin in the primary and secondary prevention of vascular disease: collaborative meta-analysis of individual participant data from randomised trials. Lancet. 2009;373:1849-60                                     | ACP Journal Club        |                   |
| 85 | Berger JS, Krantz MJ, Kittelson JM, Hiatt WR. Aspirin for the prevention of cardiovascular events in patients with peripheral artery disease: a meta-analysis of randomized trials. JAMA. 2009;301:1909-19                                                     | ACP Journal Club        |                   |
| 86 | Ray KK, Seshasai SR, Wijesuriya S, et al. Effect of intensive control of glucose on cardiovascular outcomes and death in patients with diabetes mellitus: a meta-analysis of randomised controlled trials. Lancet. 2009;373:1765-72                            | ACP Journal Club        |                   |
| 87 | Bohlius J, Schmidlin K, Brillant C, et al. Recombinant human erythropoiesis-stimulating agents and mortality in patients with cancer: a meta-analysis of randomised trials. Lancet. 2009;373:1532-42.                                                          | ACP Journal Club        |                   |

|     |                                                                                                                                                                                                                                                  |                                     |  |
|-----|--------------------------------------------------------------------------------------------------------------------------------------------------------------------------------------------------------------------------------------------------|-------------------------------------|--|
| 88  | Pascual J, Zamora J, Galeano C, Royuela A, Quereda C. Steroid avoidance or withdrawal for kidney transplant recipients. <i>Cochrane Database Syst Rev.</i> 2009;(1):CD005632                                                                     | ACP Journal Club                    |  |
| 89  | Tang BM, Craig JC, Eslick GD, Seppelt I, McLean AS. Use of corticosteroids in acute lung injury and acute respiratory distress syndrome: a systematic review and meta-analysis. <i>Crit Care Med.</i> 2009;37:1594-603                           | ACP Journal Club                    |  |
| 90  | Shah KH, Metz HA, Edlow JA. Clinical prediction rules to stratify short-term risk of stroke among patients diagnosed in the emergency department with a transient ischemic attack. <i>Ann Emerg Med.</i> 2009;53:662-73.                         | ACP Journal Club                    |  |
| 91  | Buchwald H, Estok R, Fahrbach K, et al. Weight and type 2 diabetes after bariatric surgery: systematic review and meta-analysis. <i>Am J Med</i> 2009;122:248–256.                                                                               | Evidence-Based Medicine             |  |
| 92  | Doyle LW, Crowther CA, Middleton P, et al. Magnesium sulphate for women at risk of preterm birth for neuroprotection of the fetus. <i>Cochrane Database Syst Rev</i> 2009;(1):CD004661.                                                          | Evidence-Based Medicine             |  |
| 93  | McDaid C, Griffin S, Weatherly H, et al. Continuous positive airway pressure devices for the treatment of obstructive sleep apnoea-hypopnoea syndrome: a systematic review and economic analysis. <i>Health Technol Assess</i> 2009;13(4);1–119. | Evidence-Based Medicine             |  |
| 94  | Moore D, Aveyard P, Connock M, et al. Effectiveness and safety of nicotine replacement therapy assisted reduction to stop smoking: systematic review and meta-analysis. <i>BMJ</i> 2009;338:b1024.                                               | Evidence-Based Medicine             |  |
| 95  | Ni Chroinin M, Greenstone I, Lasserson TJ, Ducharme FM. Addition of inhaled long-acting beta2-agonists to inhaled steroids as first line therapy for persistent asthma in steroid-naive adults and children.                                     | Cochrane Library-Conclusion Changed |  |
| 96  | Wang Y, Pan T, Wang Q, Guo Z. Additional bedtime H2-receptor antagonist for the control of nocturnal gastric acid breakthrough.                                                                                                                  | Cochrane Library-Conclusion Changed |  |
| 97  | Dowswell T, Middleton P, Weeks A. Antenatal day care units versus hospital admission for women with complicated pregnancy.                                                                                                                       | Cochrane Library-Conclusion Changed |  |
| 98  | Lockhart P, Daly F, Pitkethly M, Comerford N, Sullivan F. Antiviral treatment for Bell's palsy (idiopathic facial paralysis)                                                                                                                     | Cochrane Library-Conclusion Changed |  |
| 99  | Conwell LS, Chang AB. Bisphosphonates for osteoporosis in people with cystic fibrosis.                                                                                                                                                           | Cochrane Library-Conclusion Changed |  |
| 100 | McGuinness B, Todd S, Passmore P, Bullock R. Blood pressure lowering in patients without prior cerebrovascular disease for prevention of cognitive impairment and dementia.                                                                      | Cochrane Library-Conclusion Changed |  |
| 101 | Wei X, Chen Z, Yang X, Wu T. Chinese herbal medicines for esophageal cancer.                                                                                                                                                                     | Cochrane Library-Conclusion Changed |  |
| 102 | van Dalen EC, van der Pal HJH, Caron HN, Kremer LCM. Different dosage schedules for reducing cardiotoxicity in cancer patients receiving anthracycline chemotherapy.                                                                             | Cochrane Library-Conclusion Changed |  |
| 103 | Al-Shahi Salman R. Haemostatic drug therapies for acute spontaneous intracerebral haemorrhage.                                                                                                                                                   | Cochrane Library-Conclusion         |  |

|     |                                                                                                                                                                                                                    |                                     |          |
|-----|--------------------------------------------------------------------------------------------------------------------------------------------------------------------------------------------------------------------|-------------------------------------|----------|
|     |                                                                                                                                                                                                                    | Changed                             |          |
| 104 | Tang T, Lord JM, Norman RJ, Yasmin E, Balen AH. Insulin-sensitising drugs (metformin, rosiglitazone, pioglitazone, D-chiro-inositol) for women with polycystic ovary syndrome, oligo amenorrhoea and subfertility. | Cochrane Library-Conclusion Changed |          |
| 105 | Esposito M, Grusovin MG, Felice P, Karatzopoulos G, Worthington HV, Coulthard P. Interventions for replacing missing teeth: horizontal and vertical bone augmentation techniques for dental implant treatment      | Cochrane Library-Conclusion Changed | UpToDate |
| 106 | El Dib RP, Mathew JL. Interventions to promote the wearing of hearing protection.                                                                                                                                  | Cochrane Library-Conclusion Changed |          |
| 107 | Alfirevic Z, Kelly AJ, Dowswell T. Intravenous oxytocin alone for cervical ripening and induction of labour.                                                                                                       | Cochrane Library-Conclusion Changed |          |
| 108 | Cody JD, Richardson K, Moehrer B, Hextall A, Glazener CMA. Oestrogen therapy for urinary incontinence in post-menopausal women.                                                                                    | Cochrane Library-Conclusion Changed |          |
| 109 | Rerkasem K, Rothwell PM. Patch angioplasty versus primary closure for carotid endarterectomy.                                                                                                                      | Cochrane Library-Conclusion Changed |          |
| 110 | Musini VM, Tejani AM, Bassett K, Wright JM. Pharmacotherapy for hypertension in the elderly.                                                                                                                       | Cochrane Library-Conclusion Changed |          |
| 111 | Saunders DH, Greig CA, Mead GE, Young A. Physical fitness training for stroke patients.                                                                                                                            | Cochrane Library-Conclusion Changed |          |
| 112 | Smith I, Lasserson TJ. Pressure modification for improving usage of continuous positive airway pressure machines in adults with obstructive sleep apnoea.                                                          | Cochrane Library-Conclusion Changed |          |
| 113 | Austin N, Darlow BA, McGuire W. Prophylactic oral/topical non-absorbed antifungal agents to prevent invasive fungal infection in very low birth weight infants.                                                    | Cochrane Library-Conclusion Changed |          |
| 114 | Hay PPJ, Bacaltchuk J, Stefano S, Kashyap P. Psychological treatments for bulimia nervosa and bingeing.                                                                                                            | Cochrane Library-Conclusion Changed |          |
| 115 | Bulley S, Derry S, Moore RA, McQuay HJ. Single dose oral rofecoxib for acute postoperative pain in adults.                                                                                                         | Cochrane Library-Conclusion Changed |          |
| 116 | Petsky HL, Cates CJ, Li A, Kynaston JA, Turner C, Chang AB. Tailored interventions based on exhaled nitric oxide versus clinical symptoms for asthma in children and adults.                                       | Cochrane Library-Conclusion Changed |          |
| 117 | Rutjes AWS, Nuesch E, Sterchi R, Kalichman L, Hendriks E, Osiri M, Brosseau L, Reichenbach S, Juni P.                                                                                                              | Cochrane Library-                   |          |



|     |                                                                                                                                                                                                                                     |                         |  |
|-----|-------------------------------------------------------------------------------------------------------------------------------------------------------------------------------------------------------------------------------------|-------------------------|--|
|     | Transcutaneous electrostimulation for osteoarthritis of the knee.                                                                                                                                                                   | Conclusion Changed      |  |
| 118 | Thomsen T, Tønnesen H, Moller AM. Effect of preoperative smoking cessation interventions on postoperative complications and smoking cessation. <i>Br J Surg.</i> 2009;96:451-61                                                     | ACP Journal Club        |  |
| 119 | Chou R, Atlas SJ, Stanos SP, Rosenquist RW. Nonsurgical interventional therapies for low back pain: a review of the evidence for an American Pain Society clinical practice guideline. <i>Spine.</i> 2009;34:1078-93.               | ACP Journal Club        |  |
| 120 | Chou R, Baisden J, Carragee EJ, et al. Surgery for low back pain: a review of the evidence for an American Pain Society clinical practice guideline. <i>Spine.</i> 2009;34:1094-109.                                                | ACP Journal Club        |  |
| 121 | Piccini JP, Berger JS, O'Connor CM. Amiodarone for the prevention of sudden cardiac death: a meta-analysis of randomized controlled trials. <i>Eur Heart J.</i> 2009;30:1245-53                                                     | ACP Journal Club        |  |
| 122 | Brugts JJ, Yetgin T, Hoeks SE, et al. The benefits of statins in people without established cardiovascular disease but with cardiovascular risk factors: meta-analysis of randomised controlled trials. <i>BMJ.</i> 2009;338:b2376. | ACP Journal Club        |  |
| 123 | Chung M, Balk EM, Brendel M, et al. Vitamin D and calcium: a systematic review of health outcomes. <i>Evid Rep No. 183.</i> Rockville, MD: Agency for Healthcare Research and Quality; 2009.                                        | ACP Journal Club        |  |
| 124 | Arguedas JA, Perez MI, Wright JM. Treatment blood pressure targets for hypertension. <i>Cochrane Database Syst Rev.</i> 2009;(3):CD004349.                                                                                          | ACP Journal Club        |  |
| 125 | Gill SK, O'Brien L, Einarson TR, Koren G. The safety of proton pump inhibitors (PPIs) in pregnancy: a meta-analysis. <i>Am J Gastroenterol.</i> 2009;104:1541-5.                                                                    | ACP Journal Club        |  |
| 126 | Gillespie LD, Robertson MC, Gillespie WJ, et al. Interventions for preventing falls in older people living in the community. <i>Cochrane Database Syst Rev</i> 2009;(2):CD007146.                                                   | Evidence-Based Medicine |  |
| 127 | Dowling S, Spooner CH, Liang Y, et al. Accuracy of Ottawa Ankle Rules to exclude fractures of the ankle and midfoot in children: a meta-analysis. <i>Acad Emerg Med</i> 2009;16:277-87.                                             | Evidence-Based Medicine |  |
| 128 | Moore RA, Straube S, Wiffen PJ, Derry S, McQuay HJ. Pregabalin for acute and chronic pain in adults. <i>Cochrane Database Syst Rev.</i> 2009;(3):CD007076.                                                                          | ACP Journal Club        |  |
